# Supplementary material
Source: PubMed Central journal article supplement (PMC2756825)

## Supporting Information

Peng, H. L., Payton, J. L., Protasiewicz, J.D. & Simpson, M. C.

### "Twisting the Phenyls in Aryl Diphosphenes (Ar-P=P-Ar). Significant Impact upon Lowest Energy Excited States"

#### References with more than 10 authors

(26) M. J. Frisch, G. W. Trucks, H. B. Schlegel, G. E. Scuseria, M. A. Robb, J. R. Cheeseman, J. A. Montgomery, Jr., T. Vreven, K. N. Kudin, J. C. Burant, J. M. Millam, S. S. Iyengar, J. Tomasi, V. Barone, B. Mennucci, M. Cossi, G. Scalmani, N. Rega, G. A. Petersson, H. Nakatsuji, M. Hada, M. Ehara, K. Toyota, R. Fukuda, J. Hasegawa, M. Ishida, T. Nakajima, Y. Honda, O. Kitao, H. Nakai, M. Klene, X. Li, J. E. Knox, H. P. Hratchian, J. B. Cross, C. Adamo, J. Jaramillo, R. Gomperts, R. E. Stratmann, O. Yazyev, A. J. Austin, R. Cammi, C. Pomelli, J. W. Ochterski, P. Y. Ayala, K. Morokuma, G. A. Voth, P. Salvador, J. J. Dannenberg, V. G. Zakrzewski, S. Dapprich, A. D. Daniels, M. C. Strain, O. Farkas, D. K. Malick, A. D. Rabuck, K. Raghavachari, J. B. Foresman, J. V. Ortiz, Q. Cui, A. G. Baboul, S. Clifford, J. Cioslowski, B. B. Stefanov, G. Liu, A. Liashenko, P. Piskorz, I. Komaromi, R. L. Martin, D. J. Fox, T. Keith, M. A. Al-Laham, C. Y. Peng, A. Nanayakkara, M. Challacombe, P. M. W. Gill, B. Johnson, W. Chen, M. W. Wong, C. Gonzalez, and J. A. Pople *Gaussian03 (Rev.B.04)* **2003**, Gaussian, Inc. Pittsburgh, PA.

**Table S1.** Selected Geometry and Energy Results from B3LYP/6-31G+(d,p) Calculations of Ph-P=P-Ph geometry optimizations as a function of  $\tau_1 = \tau_2 = \tau$  (PPCC) phenyl twist angle, and for the central Ph-P=P-Ph cores of the crystal structures of Dmp-P=P-Dmp and Mes\*-P=P-Mes\* diphosphenes.

| $\tau$ (PPCC)<br>/Degrees | r(P=P)<br>/Å | r(P-C)<br>/Å | $\theta$ (PPC)<br>/Degrees | E(HOMO-1)<br>/eV | E(HOMO)<br>/eV | E(LUMO)<br>/eV | Relative Total E <sup>d</sup><br>/eV |
|---------------------------|--------------|--------------|----------------------------|------------------|----------------|----------------|--------------------------------------|
| 0                         | 2.0563       | 1.8393       | 104.1                      | -6.689           | -6.069         | -2.933         | 0.0324                               |
| 15                        | 2.0572       | 1.8385       | 103.6                      | -6.717           | -6.085         | -2.917         | 0.0184                               |
| 30                        | 2.0577       | 1.8388       | 102.3                      | -6.788           | -6.140         | -2.877         | 0.0034                               |
| 32.4 <sup>a</sup>         | 2.0576       | 1.8385       | 102.2                      | -6.792           | -6.146         | -2.875         | 0.0000                               |
| 45                        | 2.0563       | 1.8416       | 101.0                      | -6.879           | -6.224         | -2.843         | 0.0242                               |
| 60                        | 2.0532       | 1.8473       | 100.2                      | -6.981           | -6.307         | -2.847         | 0.0907                               |
| 75                        | 2.0504       | 1.8534       | 99.9                       | -7.056           | -6.363         | -2.879         | 0.1632                               |
| 90                        | 2.0494       | 1.8559       | 99.8                       | -7.073           | -6.384         | -2.899         | 0.1945                               |
| 62.0 <sup>b</sup>         | 2.0463       | 1.8662       | 102.4                      | -6.859           | -6.234         | -2.816         | 0.5179                               |
| 81.2/13.0 <sup>c</sup>    | 1.9849       | 1.8403       | 97.5                       | -6.588           | -6.394         | -2.709         | 0.2378                               |
|                           |              | 1.8420       | 109.8                      |                  |                |                |                                      |

a. Minimum energy, unconstrained geometry of Ph-P=P-Ph at this level of computation.

b. Ph-P=P-Ph core crystal structure of Mes\*P=PMes\* (reference 24).

c. Ph-P=P-Ph core crystal structure of DmpP=PDmp (reference 25).

d. Relative to the energy of the 32.4° minimum energy structure.

**Table S2.** Selected Geometry and Energy Results from B3LYP/6-311G+(2df,2p) Calculations of Ph-P=P-Ph geometry optimizations as a function of  $\tau_1 = \tau_2 = \tau$  (PPCC) phenyl twist angle.

| $\tau$ (PPCC)<br>/Degrees | r(P=P)<br>/Å | r(P-C)<br>/Å | $\theta$ (PPC)<br>/Degrees | E(HOMO-1)<br>/eV | E(HOMO)<br>/eV | E(LUMO)<br>/eV | Relative Total E <sup>b</sup><br>/eV |
|---------------------------|--------------|--------------|----------------------------|------------------|----------------|----------------|--------------------------------------|
| 0                         | 2.0436       | 1.8307       | 104.2                      | -6.646           | -6.087         | -2.886         | 0.0246                               |
| 15                        | 2.0443       | 1.8301       | 103.7                      | -6.676           | -6.103         | -2.869         | 0.0151                               |
| 30                        | 2.0447       | 1.8301       | 102.5                      | -6.751           | -6.155         | -2.824         | 0.0021                               |
| 34.0 <sup>a</sup>         | 2.0446       | 1.8302       | 102.3                      | -6.770           | -6.167         | -2.817         | 0.0000                               |
| 45                        | 2.0430       | 1.8328       | 101.2                      | -6.847           | -6.234         | -2.778         | 0.0189                               |
| 60                        | 2.0398       | 1.8385       | 100.3                      | -6.952           | -6.311         | -2.767         | 0.0737                               |
| 75                        | 2.0367       | 1.8443       | 100.0                      | -7.034           | -6.363         | -2.783         | 0.1349                               |
| 90                        | 2.0355       | 1.8467       | 99.9                       | -7.060           | -6.379         | -2.795         | 0.1621                               |

a. Minimum energy, unconstrained geometry of Ph-P=P-Ph at this level of computation.

b. Relative to the energy of the 34.0° minimum energy structure.

**Figure S1. A.** Comparison of the ground state potential energy for Ph-P=P-Ph using B3LYP and the two basis sets 6-31+G(d,p) and 6-311+G(2df,2p). **B.** Comparison of these diagonals ( $\tau_1 = \tau_2$ ) along the PES for Ph-P=P-Ph for both basis sets with that of a model diphosphene designed to simulate the Mes\* ligand (bis-(2,6-*t*Bu<sub>2</sub>C<sub>6</sub>H<sub>2</sub>)diphosphene) at the B3LYP/6-31+G(d,p) level.

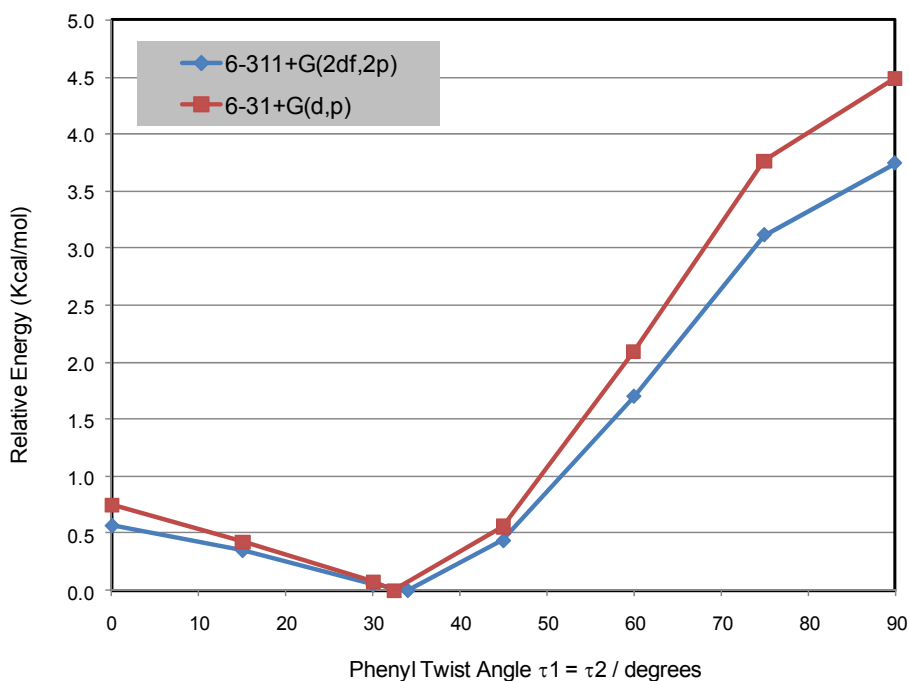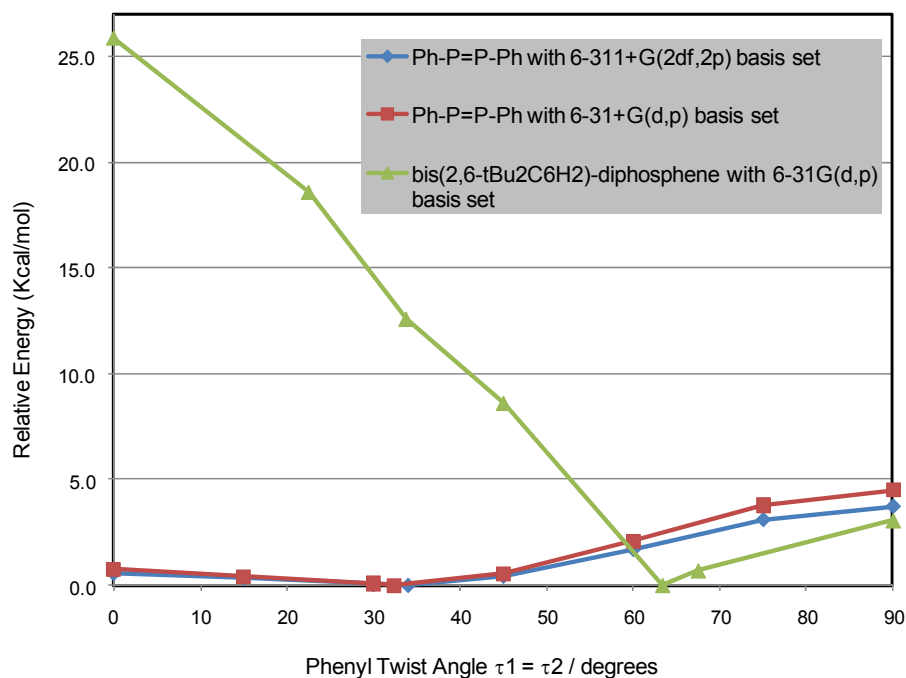

**Figure S2.** Comparison of the Kohn-Sham molecular orbital energies for Ph-P=P-Ph using B3LYP and the two basis sets 6-31+G(d,p) and 6-311+G(2df,2p).

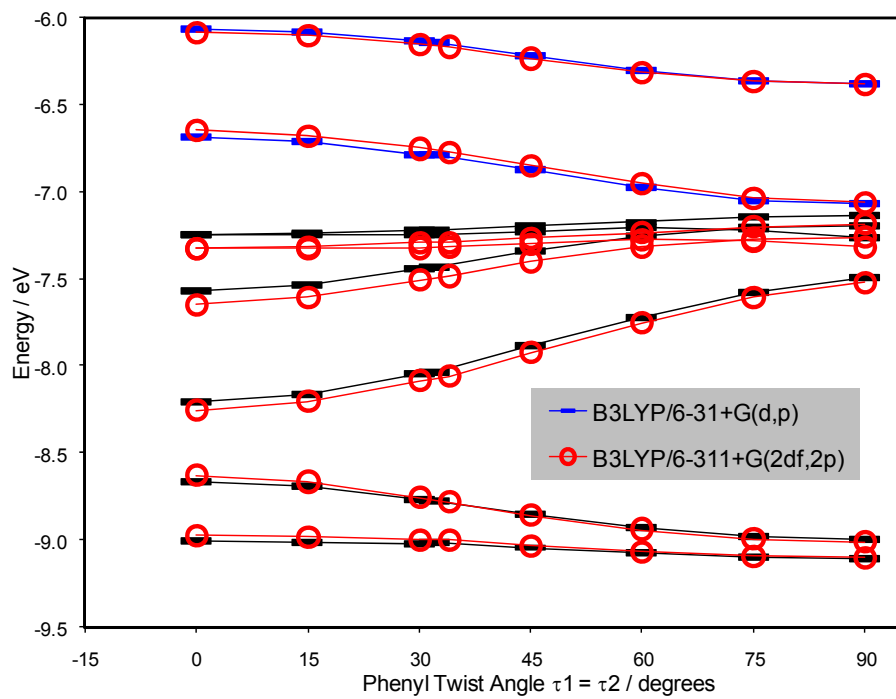

**Figure S3.** Comparison of the energies of the first several singlet excited states for Ph-P=P-Ph using B3LYP and the two basis sets 6-31+G(d,p) and 6-311+G(2df,2p).

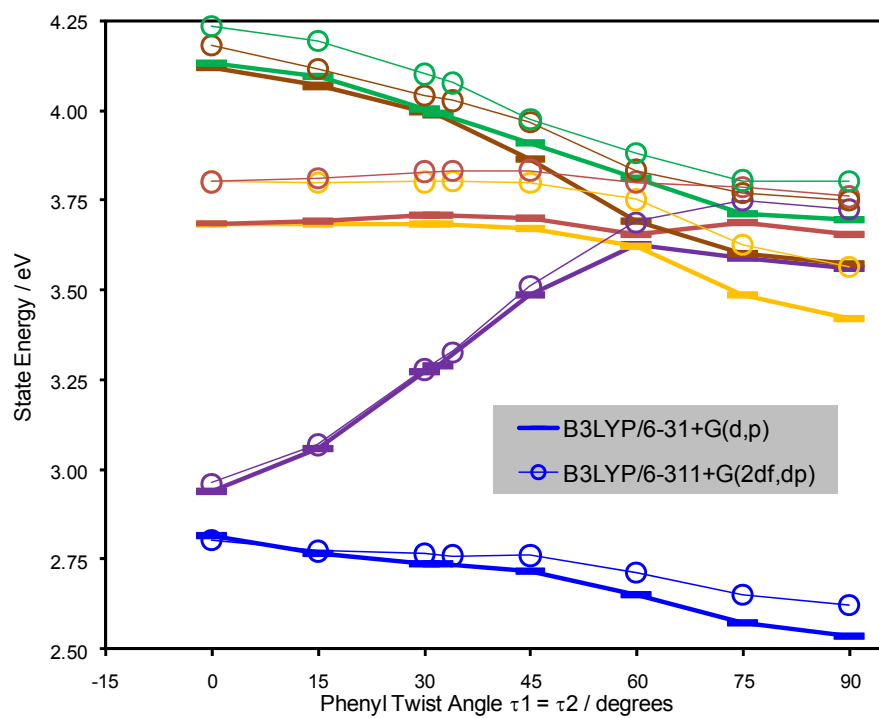

Supplement: NIHMS122379-supplement-1_si_001.pdf [file NIHMS122379-supplement-1_si_001.pdf]
